# Supplementary material for: Spray-coated all-solid-state potentiometric sensors
Source: Royal Society of Chemistry journal article supplement (doi:10.1039/c4an01277a), 2014-01-01
Supplement: c4an01277a1.pdf [file c4an01277a1.pdf]

## Spray coated all-solid-state potentiometric sensors

Ewa Jaworska<sup>1</sup>, Morten Schmidt<sup>2</sup>, Giuseppe Scarpa<sup>2</sup>,  
Krzysztof Maksymiuk<sup>1</sup> and Agata Michalska<sup>1</sup>

<sup>1</sup>Faculty of Chemistry, University of Warsaw, Pasteura 1, 02-093 Warsaw, Poland

<sup>2</sup> Technische Universität München, Institute for Nanoelectronics, Arcisstrasse 21, 80333 München, Germany

### Supporting information

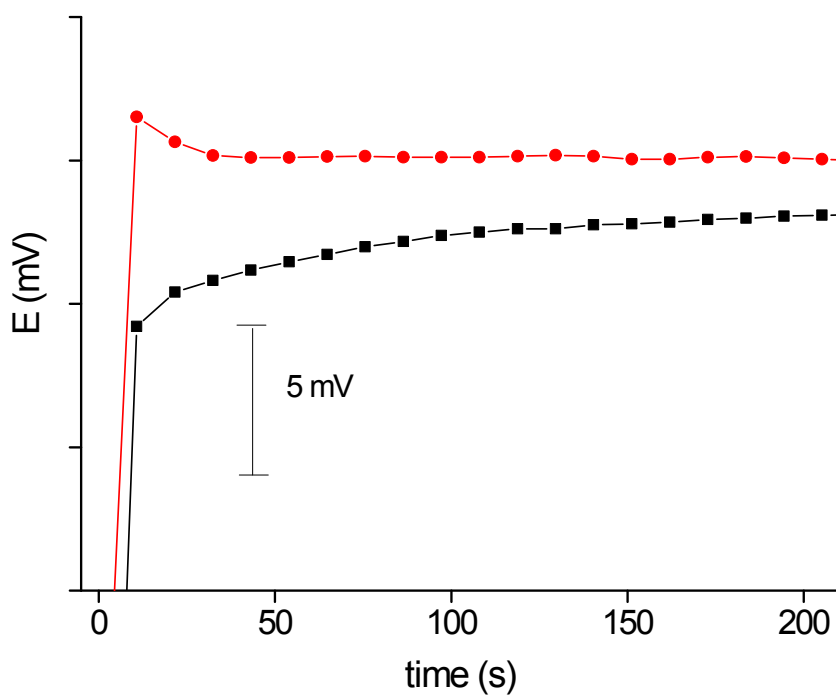

Fig. S1. Response time of tested sensors for electrolyte concentration changes from  $10^{-2}$  to  $10^{-3}$  M KCl prepared using (■) PET or (●) Kapton substrate.

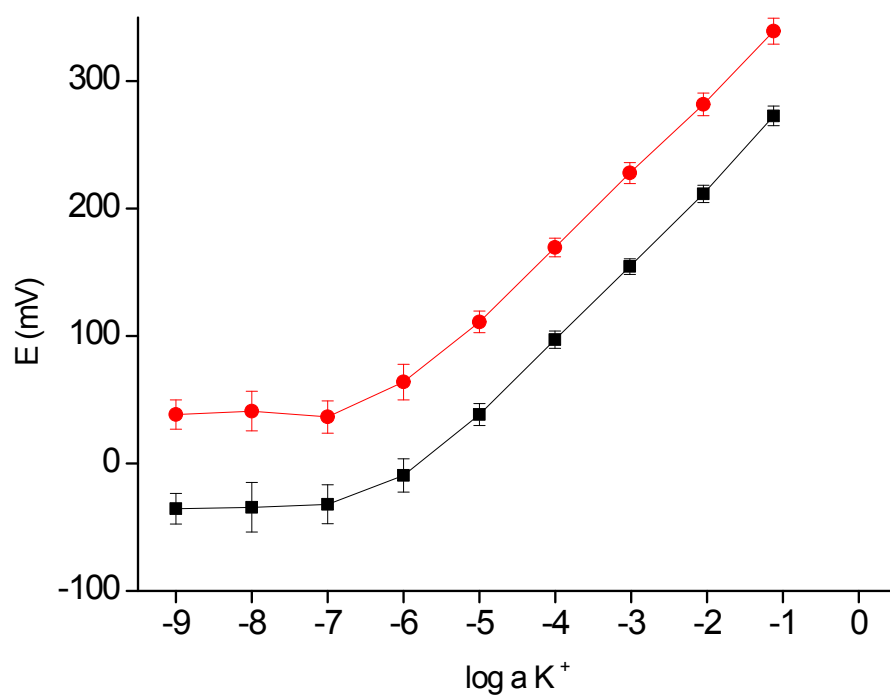

Fig. S2. Mean potential values  $\pm$  SD recorded in course of three calibrations performed during four days (different bath Kapton based electrode compared to that presented in Fig. 2) for spray coated sensors using either: (■) PET or (●) Kapton, substrate.

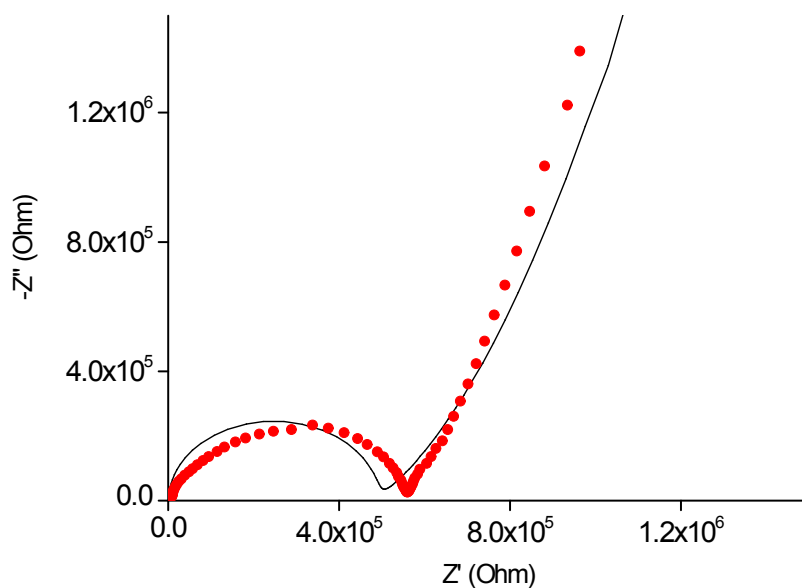

Fig. S3. Complex plane impedance plots - of tested spray coated  $K^+$ - electrodes prepared using (●) Kapton recorded in 0.1 M KCl solution [Fig. 3], using 50 mV amplitude at 0.3 V potential, in the frequency range from 0.01 Hz to  $10^5$  Hz compared to (black line) fitting to equivalent circuit presented in Fig. 3 using fitting tools of CH-Instruments software.
